# Supplementary material for: Rate and Predictors of Mucosal Healing in Ulcerative Colitis Treated with Thiopurines: Results of a Multicentric Cohort Study
Source: Springer Nature journal article supplement (doi:10.1007/s10620-016-4374-0), 2016-11-16
Supplement: MOESM1 [file 11053526]

| **Author** | **Study design** | **Mucosal assessment (N)** | **Treatments** | **Mucosal healing** |
| --- | --- | --- | --- | --- |
| Ardizzone et al. Gut 2006 | prospective | 36 | Azathioprine + 5-ASA (vs. 5-ASA) | 53% |
| Panaccione et al. Gastroenterology 2014 | prospective | 76 | Azathioprine (vs. infliximab + azathioprine vs. Infliximab) | 37% |
| Yamada et al. Intest Res 2015 | retrospective | 38 | Thiopurine after induction of remission (ciclosporin, steroids, apheresis, 5-ASA) | 60.5% |

**SUPPLEMENTARY-T1: Published data about mucosal healing in ulcerative colitis treated with thiopurine monotherapy**
